# Supplementary material
Source: publisher figshare collection journal article supplement (https://acs.figshare.com/ndownloader/files/17824187)
Supplement: Supplementary file 1 [file 17824187]

# Supporting Information on “Replica-exchange umbrella sampling combined with Gaussian accelerated molecular dynamics for free-energy calculation of biomolecules”

*Hiraku Oshima<sup>†</sup>, Suyong Re<sup>†</sup>, Yuji Sugita<sup>\*†‡§</sup>*

<sup>†</sup> Laboratory for Biomolecular Function Simulation, RIKEN Center for Biosystems Dynamics Research, Integrated Innovation Building 7F, 6-7-1 Minatojima-minamimachi, Chuo-ku, Kobe, Hyogo 650-0047, Japan

<sup>‡</sup> Theoretical Molecular Science Laboratory, RIKEN Cluster for Pioneering Research, 2-1 Hirosawa, Wako-shi, Saitama 351-0198, Japan

<sup>§</sup> Computational Biophysics Research Team, RIKEN Center for Computational Science, Integrated Innovation Building 7F, 6-7-1 Minatojima-minamimachi, Chuo-ku, Kobe, Hyogo 650-0047, Japan

Corresponding Author:

\*E-mail: [sugita@riken.jp](mailto:sugita@riken.jp)

Contents:

Three supplementary figures (S1-S3)

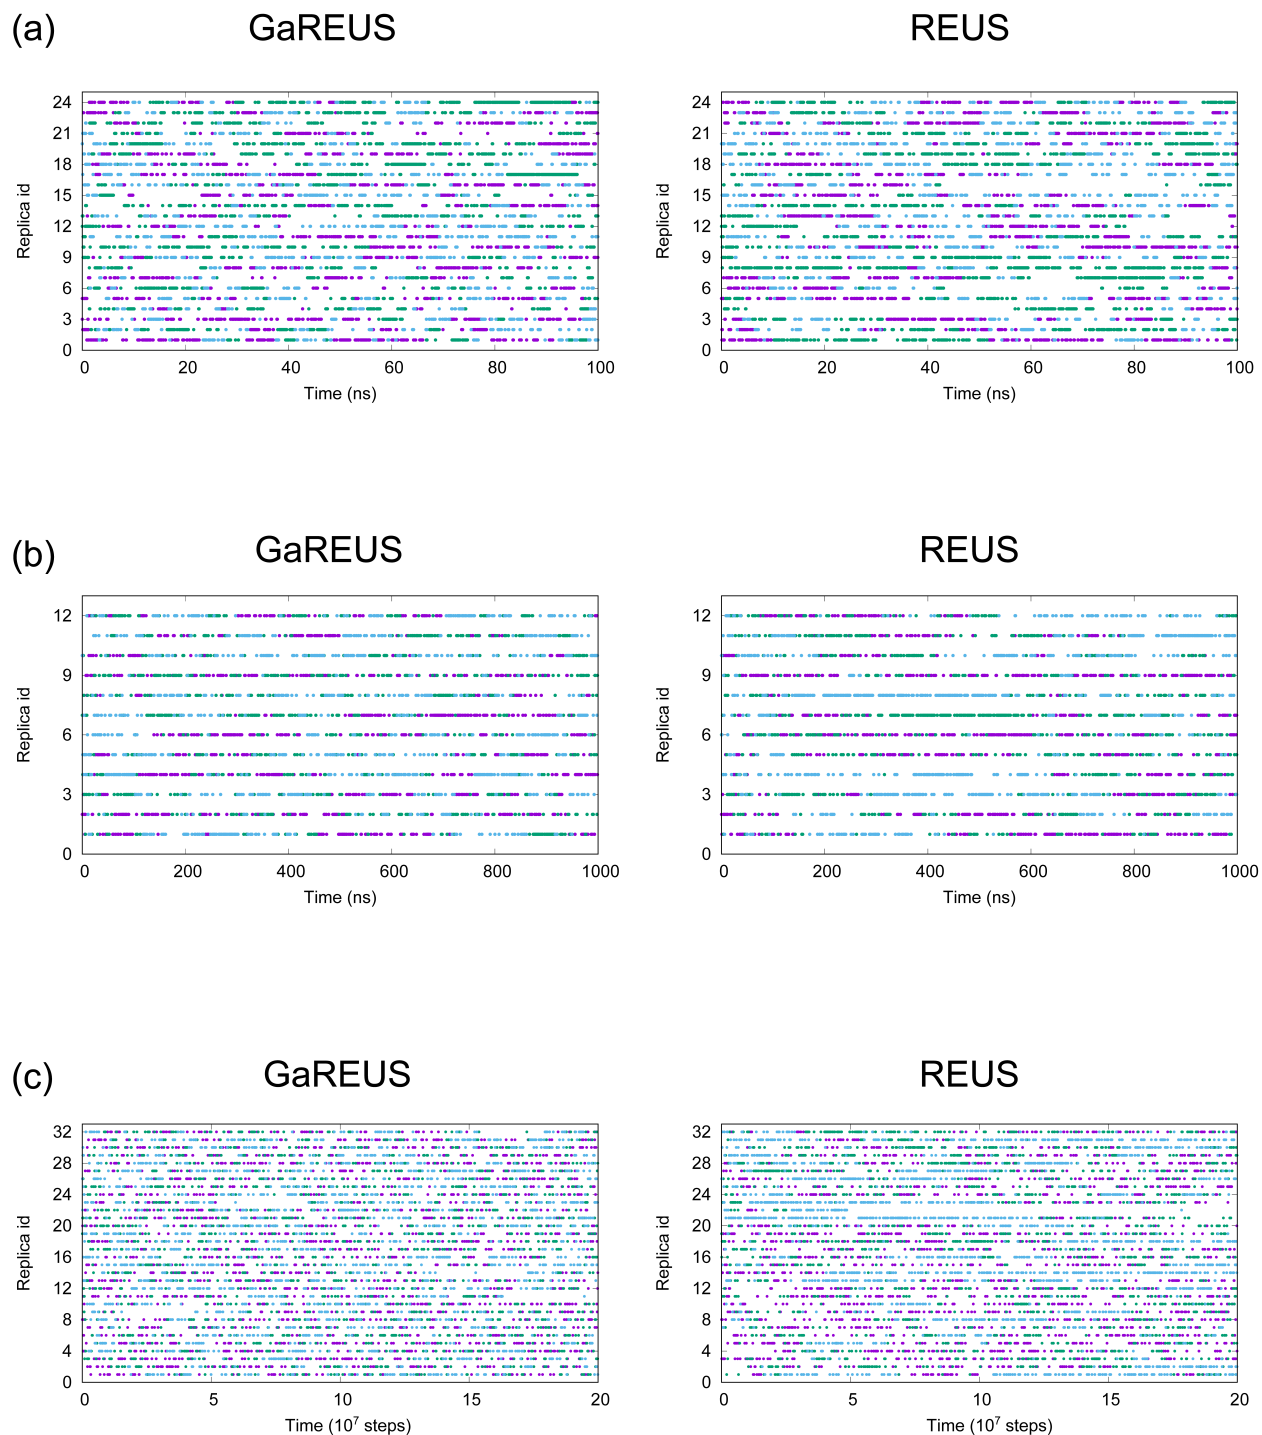

Figure S1. Time series of replica exchanges of parameters in GaREUS and REUS simulations. (a) Bi9. The midpoint values of  $\omega$  angles  $-15^\circ$  (purple),  $90^\circ$  (green), and  $-150^\circ$ . (b) Chignolin. The midpoint values  $\xi_i = 19 \text{ \AA}$  (purple),  $11 \text{ \AA}$  (green), and  $7 \text{ \AA}$  (cyan). (c) AdK. The midpoint values  $\xi_i = 30 \text{ \AA}$  (purple),  $24.5 \text{ \AA}$  (green), and  $20.5 \text{ \AA}$  (cyan).

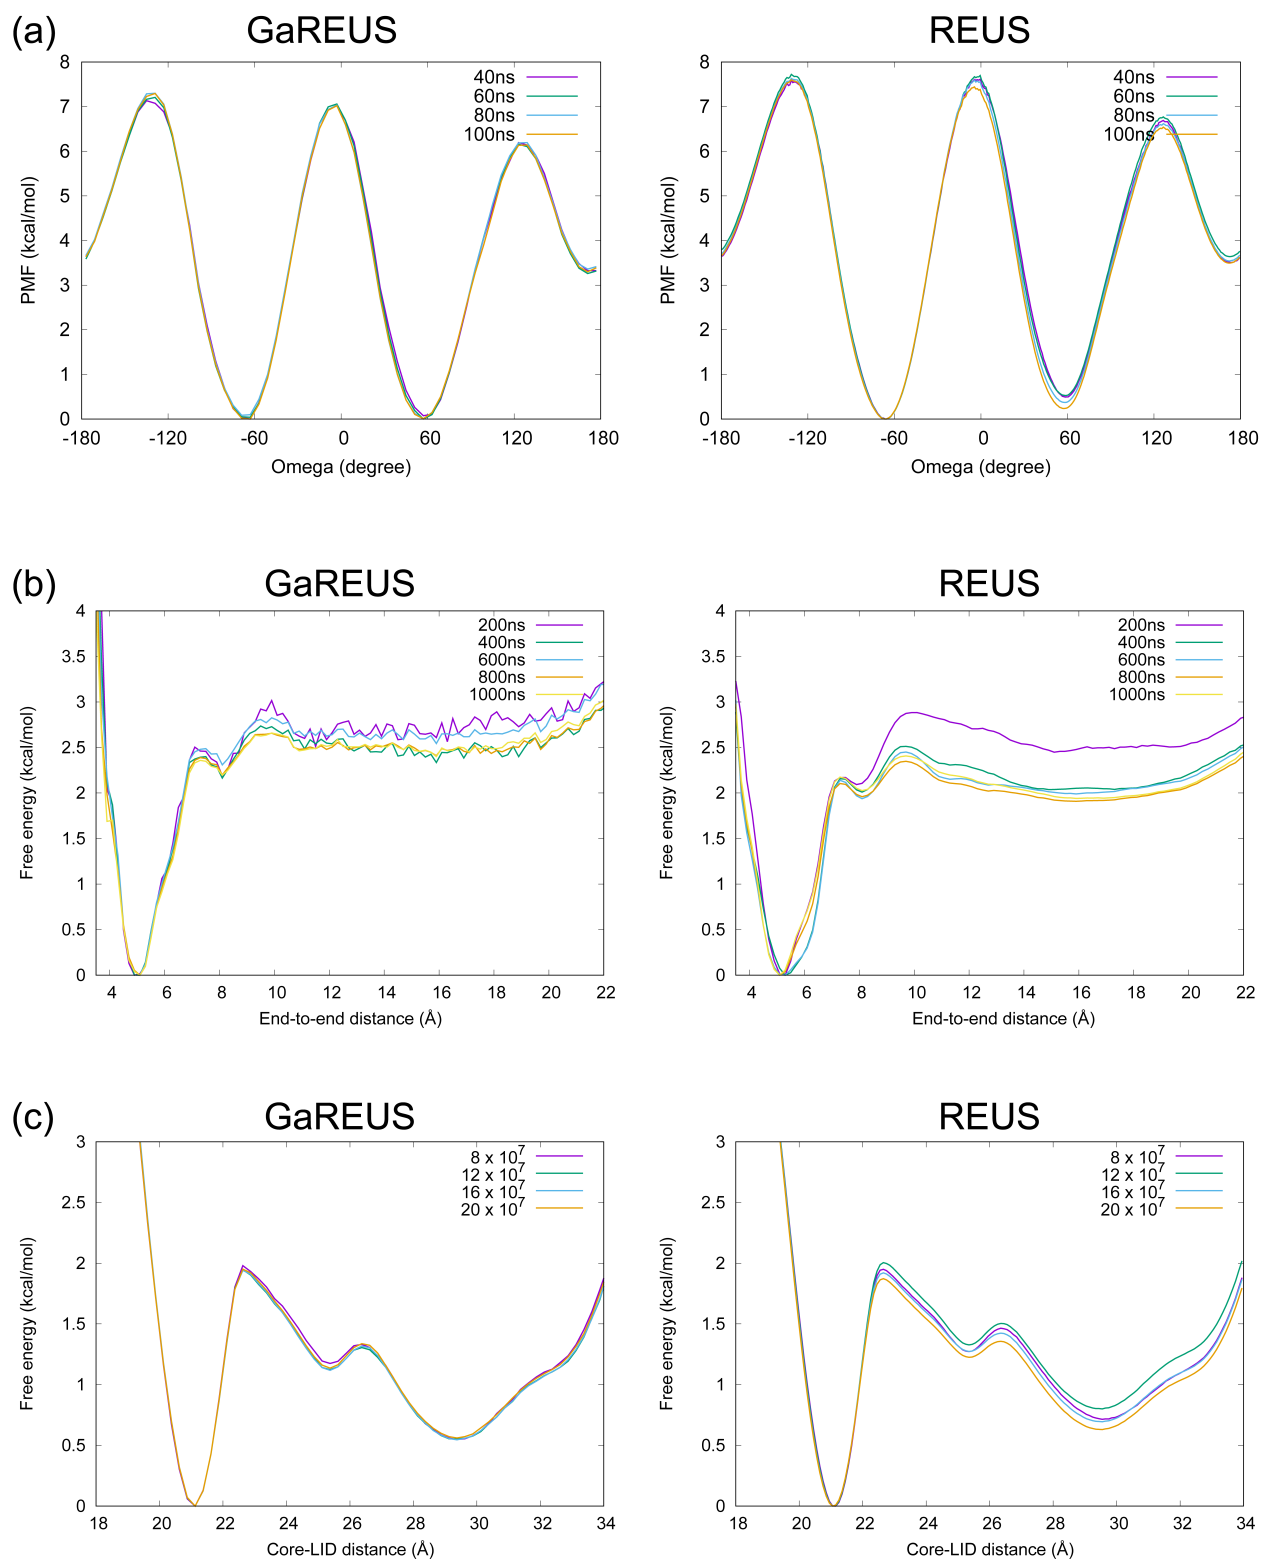

Figure S2. Free-energy landscapes of GaREUS and REUS along the CV for (a) Bi9, (b) chignolin, and (c) AdK.

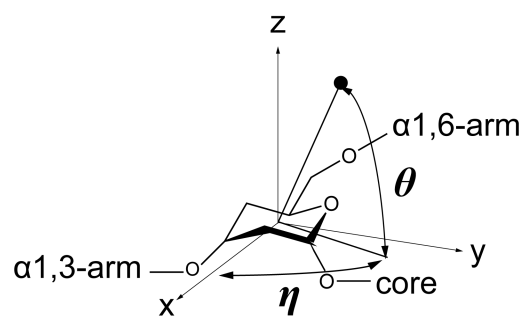

Figure S3. Definition of the spherical coordinate. The angle  $\eta$  represents swing motion of the  $\alpha 1,6$ -arm around the z (polar) axis, while the angle  $\theta$  represents up down motion with respect to the xy-plane.
